# Supplementary material for: Non-Invasive Approach for Evaluation of Pulmonary Hypertension Using Extracellular Vesicle-Associated Small Non-Coding RNA
Source: PubMed Central journal article supplement (PMC6920761; doi:10.3390/biom9110666), 2019-10-29
Supplement: biomolecules-09-00666-s001.pdf [file biomolecules-09-00666-s001.pdf]

# *Supplementary material*

## **Non-invasive approach for evaluation of pulmonary hypertension using extracellular vesicle-associated small non-coding RNA**

**Christoph Lipps** <sup>1,2,3,\*</sup>, **Philipp Northe** <sup>1,3</sup>, **Ricardo Figueiredo** <sup>4</sup>, **Manfred Rohde** <sup>5</sup>,  
**Alexandra Brahmer** <sup>6</sup>, **Eva-Maria Krämer-Albers** <sup>6</sup>, **Christoph Liebetrau** <sup>2,3</sup>,  
**Christoph B. Wiedenroth** <sup>7</sup>, **Eckhard Mayer** <sup>7</sup>, **Steffen D. Kriechbaum** <sup>2,3</sup>, **Oliver Dörr** <sup>1,2,3</sup>,  
**Holger Nef** <sup>1,2,3</sup>, **Christian W. Hamm** <sup>1,2,3</sup>, **Till Keller** <sup>1,2,3</sup> and **Christian Troidl** <sup>1,2,3</sup>

<sup>1</sup> Medical Clinics I-Cardiology and Angiology, Justus-Liebig-University Giessen, 35392 Giessen, Germany;

<sup>2</sup> Department of Cardiology, Kerckhoff Clinic GmbH, 61231 Bad Nauheim, Germany;

<sup>3</sup> German Centre for Cardiovascular Research, Partner Site Rhine-Main, Benekestrasse 2–8, 61231 Bad Nauheim, Germany

<sup>4</sup> GenXPro GmbH, 60438 Frankfurt am Main, Germany;

<sup>5</sup> Central Facility for Microscopy, Helmholtz Centre for Infection Research, 38124 Braunschweig, Germany;

<sup>6</sup> Institute of Developmental Biology and Neurobiology, Biology of Extracellular Vesicles, Johannes Gutenberg-University, 55122 Mainz, Germany;

<sup>7</sup> Department of Thoracic Surgery, Kerckhoff Clinic GmbH, 61231 Bad Nauheim, Germany;

\* Correspondence: christoph.lipps@innere.med.uni-giessen.de; Tel.: +49-641-99-42248

# Supplementary figures

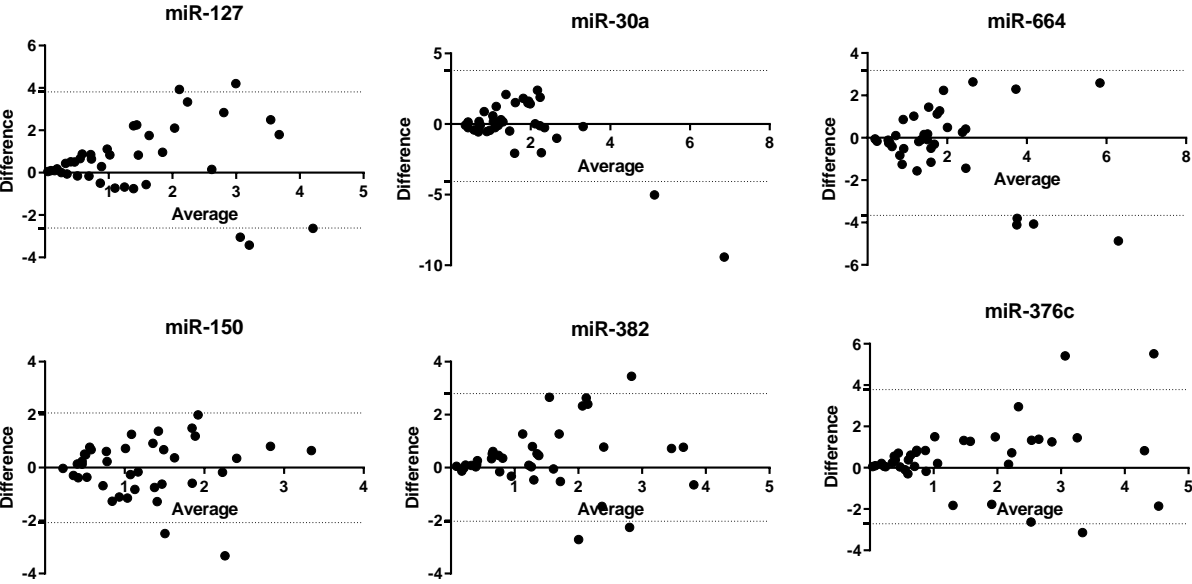

**Suppl. Fig. S1:** Comparison of the EV-associated miRNA expression levels of TEI and ExoRNeasy protocol isolates. Bland-Altman analysis with 95% confidence interval was performed for the normalized miRNA ratios of EVs isolated via the two protocols. Each dot represents an individual sample. Displayed is the difference ( $\text{ExoEasy}_{\text{normalized\_ratio}} - \text{TEI}_{\text{normalized\_ratio}}$ ) as a function of the average of  $\text{ExoEasy}_{\text{normalized\_ratio}}$  and  $\text{TEI}_{\text{normalized\_ratio}}$  for each individual sample.

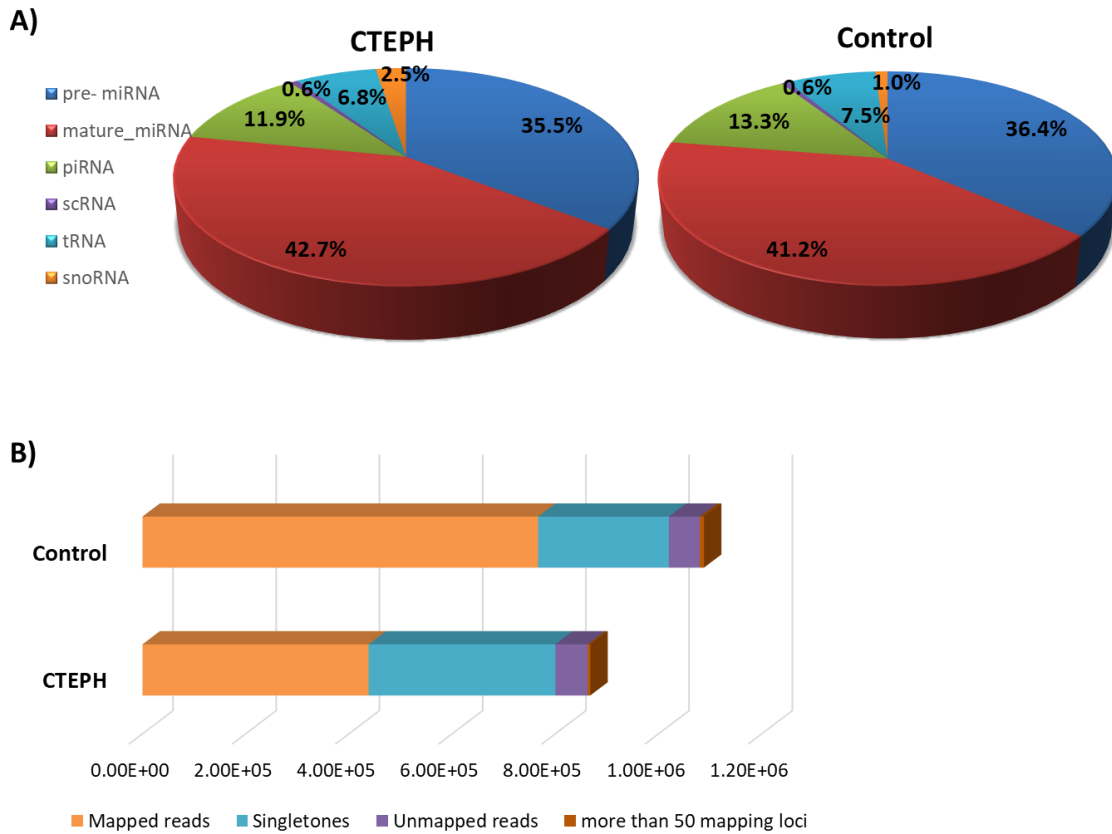

**Suppl. Fig. S2:** Small RNA profiles and mapping statistics of EV-RNA from CTEPH patients and control individuals. Top panel (A) shows the relative abundance of the reads annotated for the indicated RNA subclasses after normalization (pre-miRNA, mature miRNA, piRNA, small cytoplasmic RNA (scRNA), transfer RNA (tRNA) and small nucleolar ribonucleic acid RNA (snoRNA)). Bottom panel (B) shows the mapping statistics of the small RNA-seq data.

## Supplementary tables

**Suppl. Table 1:** Normalized expression levels of differentially expressed piRNA clusters. Analysis of piRNAs isolated by ExoRNeasy using TrueQuant technology.

| piRNA ID                                                                                                             | CTEPH<br>(Normalized<br>expression) | Control<br>(Normalized<br>expression) | Log <sub>2</sub> FC | p-value  |
|----------------------------------------------------------------------------------------------------------------------|-------------------------------------|---------------------------------------|---------------------|----------|
| hsa_piR_020500 gb DQ598190                                                                                           | 251.81                              | 1102.68                               | -2.131              | 1.28E-05 |
| hsa_piR_020500 gb DQ598190; hsa_piR_020793 gb DQ598619                                                               | 61.57                               | 272.036                               | -2.144              | 2.56E-05 |
| hsa_piR_020500 gb DQ598190; hsa_piR_020497 gb DQ598177                                                               | 64.50                               | 278.84                                | -2.112              | 3.42E-05 |
| hsa_piR_015249 gb DQ590830                                                                                           | 14.92                               | 307.643                               | -4.366              | 0.00012  |
| hsa_piR_015026 gb DQ590548                                                                                           | 120.98                              | 312.891                               | -1.371              | 0.00247  |
| hsa_piR_020326 gb DQ597916; hsa_piR_001311 gb DQ571812;<br>hsa_piR_018569 gb DQ595533; hsa_piR_015026 gb DQ590548    | 6941.61                             | 17150.4                               | -1.305              | 0.0026   |
| hsa_piR_015026 gb DQ590548; hsa_piR_018569 gb DQ595533;<br>hsa_piR_001311 gb DQ571812; hsa_piR_020326 gb DQ597916    | 3470.60                             | 8574.83                               | -1.305              | 0.00261  |
| hsa_piR_000765 gb DQ570956; hsa_piR_001312 gb DQ571813;<br>hsa_piR_018570 gb DQ595536                                | 3485.47                             | 8588.33                               | -1.301              | 0.00269  |
| hsa_piR_018570 gb DQ595536; hsa_piR_001312 gb DQ571813;<br>hsa_piR_000765 gb DQ570956                                | 14295.50                            | 34964.4                               | -1.290              | 0.00303  |
| hsa_piR_009295 gb DQ582567; hsa_piR_001312 gb DQ571813;<br>hsa_piR_018570 gb DQ595536                                | 3729.58                             | 9090.37                               | -1.285              | 0.00328  |
| hsa_piR_018570 gb DQ595536; hsa_piR_001312 gb DQ571813;<br>hsa_piR_000765 gb DQ570956; hsa_piR_000291 gb DQ570344    | 3641.22                             | 8869.98                               | -1.285              | 0.00332  |
| hsa_piR_018570 gb DQ595536; hsa_piR_001312 gb DQ571813;<br>hsa_piR_020326 gb DQ597916                                | 3641.46                             | 8869.17                               | -1.284              | 0.00333  |
| hsa_piR_020326 gb DQ597916; hsa_piR_001312 gb DQ571813;<br>hsa_piR_018570 gb DQ595536                                | 3641.87                             | 8870.87                               | -1.284              | 0.00333  |
| hsa_piR_018569 gb DQ595533; hsa_piR_015026 gb DQ590548                                                               | 337.71                              | 818.684                               | -1.278              | 0.00394  |
| hsa_piR_000794 gb DQ570992; hsa_piR_019914 gb DQ597347;<br>hsa_piR_016945 gb DQ593356; hsa_piR_022628 gb DQ600952    | 85.39                               | 267.591                               | -1.648              | 0.00945  |
| hsa_piR_022628 gb DQ600952; hsa_piR_016945 gb DQ593356;<br>hsa_piR_019914 gb DQ597347; hsa_piR_016742 gb DQ593049    | 169.66                              | 487.321                               | -1.522              | 0.01322  |
| hsa_piR_019752 gb DQ597110; hsa_piR_016926 gb DQ593325;<br>hsa_piR_016984 gb DQ593431                                | 4311.78                             | 49964.3                               | -3.535              | 0.02069  |
| hsa_piR_016984 gb DQ593431; hsa_piR_016926 gb DQ593325;<br>hsa_piR_019752 gb DQ597110                                | 7370.39                             | 83776.8                               | -3.507              | 0.02115  |
| hsa_piR_016984 gb DQ593431; hsa_piR_019752 gb DQ597110                                                               | 1474.10                             | 16737.6                               | -3.505              | 0.02121  |
| hsa_piR_019914 gb DQ597347;<br>hsa_piR_016742 gb DQ593049; hsa_piR_016945 gb DQ593356;<br>hsa_piR_022628 gb DQ600952 | 169.85                              | 440.224                               | -1.374              | 0.02379  |
| hsa_piR_016735 gb DQ593039                                                                                           | 179.97                              | 15.6378                               | 3.525               | 0.03029  |
| hsa_piR_017724 gb DQ594465; hsa_piR_004308 gb DQ575882;<br>hsa_piR_016745 gb DQ593052                                | 403.73                              | 942.526                               | -1.223              | 0.03103  |
| hsa_piR_004308 gb DQ575882; hsa_piR_017724 gb DQ594465;<br>hsa_piR_016745 gb DQ593052                                | 590.13                              | 1341.65                               | -1.185              | 0.03302  |

**Suppl. Table 2:** Selection of predicted target genes of the differentially regulated piRNAs. MiRanda software with a minimum score of 190 was used for target prediction.

| Gene symbol | piRNA    | Targeted transcript ID | Tot Score | Tot Energy | Max Score | Max Energy | Strand  | Len1 | Len2 | Positions |
|-------------|----------|------------------------|-----------|------------|-----------|------------|---------|------|------|-----------|
| ADAMTS6     | DQ593431 | ENST00000381055.7      | 190.00    | -37.66     | 190.00    | -37.66     | 124442  | 32   | 7311 | 6531      |
|             | DQ593431 | ENST00000381052.8      | 190.00    | -37.66     | 190.00    | -37.66     | 124443  | 32   | 6956 | 6179      |
| NDST1       | DQ570956 | ENST00000523767.5      | 193.00    | -33.67     | 193.00    | -33.67     | 1838333 | 31   | 3449 | 1666      |
|             | DQ597916 | ENST00000523767.5      | 193.00    | -32.79     | 193.00    | -32.79     | 2200071 | 31   | 3449 | 1666      |
| DNM2        | DQ571813 | ENST00000590806.5      | 194.00    | -32.93     | 194.00    | -32.93     | 1783006 | 31   | 5651 | 1188      |
|             | DQ571813 | ENST00000590787.1      | 194.00    | -32.93     | 194.00    | -32.93     | 1783007 | 31   | 4299 | 499       |
| SNX17       | DQ593039 | ENST00000233575.6      | 201.00    | -36.78     | 201.00    | -36.78     | 4455891 | 31   | 2044 | 29        |
|             | DQ593039 | ENST00000537606.5      | 201.00    | -36.78     | 201.00    | -36.78     | 4455900 | 31   | 2400 | 55        |

**Suppl. Table 3:** piRNA sequences used for TaqMan Assay design

| NCBI accession number | Sequence                        |
|-----------------------|---------------------------------|
| DQ593431              | CGTGCTGGGCCATAACCCAGAGGTCGATGGA |
| DQ570956              | AGCATTGGTGGTTCAGTGGTAGAATTCTCGC |
| DQ593039              | CCGCCTGGGAATACCGGGTGCTGTAGGCTTA |

**Suppl. Table 4:** TaqMan MicroRNA assays (ThermoFisher Scientific, Germany) for RT-PCR analysis

| <i>Target</i>   | <i>Assay ID</i> |
|-----------------|-----------------|
| hsa-miR-664a-3p | 002897          |
| hsa-miR-382-5p  | 000572          |
| hsa-miR-127-3p  | 000452          |
| hsa-miR-376c-3p | 002122          |
| hsa-miR-30a-5p  | 000417          |
| hsa-miR-150-5p  | 000473          |
| cel-miR-39      | 000200          |
